1 Sensitive detection of highly fragmented cytomegalovirus nucleic acid in human cfDNA

2

3 Vikas Peddu<sup>1,%</sup>, Benjamin T. Bradley<sup>1,%</sup>, R. Swati Shree<sup>2</sup>, Brice G. Colbert<sup>1</sup>, Hong Xie<sup>1</sup>, Tracy K.

4 Santo<sup>1</sup>, Meei-Li Huang<sup>1</sup>, Edith Y. Cheng<sup>2</sup>, Eric Konnick<sup>1</sup>, Stephen J. Salipante<sup>1</sup>, Keith R.

5 Jerome<sup>1,3</sup>, Christina M. Lockwood<sup>1</sup>, Alexander L. Greninger<sup>1,3,#</sup>

6

7 <sup>1</sup>Department of Laboratory Medicine, University of Washington, Seattle, WA, USA

8 <sup>2</sup>Department of Obstetrics and Gynecology, University of Washington, Seattle, WA, USA

9 <sup>3</sup>Fred Hutchinson Cancer Research Center, Seattle, WA, USA

10 <sup>%</sup>These authors contributed equally to this work.

11 <sup>#</sup>corresponding author, Alexander L. Greninger, [agrening@uw.edu](mailto:agrening@uw.edu)

12

13 Keywords: human cytomegalovirus, CMV, cfDNA, NIPT, sequencing

14 Abstract word count: 247

15 Main text word count: 4313

16

17

18 **Abstract**

19 Congenital human cytomegalovirus (CMV) infections are the leading cause of newborn  
20 hearing and central nervous system impairments worldwide. Currently, routine prenatal  
21 screening for congenital CMV is not performed in the United States and confirmation in  
22 suspected perinatal cases requires invasive sampling by amniocentesis. We hypothesized that  
23 detection of CMV from maternal cell-free DNA (cfDNA) plasma could provide a non-invasive  
24 indicator of congenital CMV infection. We analyzed sequence data from 2,208 individuals  
25 undergoing routine non-invasive prenatal aneuploidy screening at the University of Washington.  
26 CMV reads were identified in 117 (5.3%) samples. Positive samples were stratified based on  
27 CMV reads per million sample reads (RPM), resulting in ten samples being classified as strong  
28 positive ( $RPM > 0.3$ ) and 107 as intermediate positive ( $0.01 < RPM < 0.3$ ). Subsequent qPCR  
29 testing identified CMV in 9/10 strong positive samples and 2/32 intermediate positive samples.  
30 Median cfDNA insert size derived from CMV was significantly shorter than cfDNA derived from  
31 human chromosomes (103 vs 172 bp,  $p < 0.0001$ ), corresponding to the 3<sup>rd</sup> percentile of human  
32 cfDNA insert size. In addition, CMV cfDNA fragment lengths were distributed over a wider range  
33 than human cfDNA reads. These studies reveal the highly fragmented nature of CMV cfDNA  
34 and offer precise measurements of its length: these features likely explain discrepancies in  
35 serum CMV viral loads measurements determined by different qPCR assays, despite  
36 widespread efforts to standardize results. More work is required to determine how detection of  
37 CMV from maternal cfDNA can be best used as tool for congenital CMV screening or diagnosis.

## 38 **Introduction**

39 Human cytomegalovirus (CMV) is the most common cause of congenital defects in the  
40 United States and affects roughly 0.5-1.3% of live births worldwide (1, 2), causing more  
41 congenital disease than all disorders tested for in newborn screening combined (4). Congenital  
42 CMV is associated with a variety of late-onset permanent disabilities such as hearing loss,  
43 microcephaly, vision defects, and intellectual deficits (3). Primary maternal CMV infection is  
44 associated with a 40% risk of fetal infection, whereas recurrent infection has an approximately  
45 1% transmission rate (3). The high prevalence of recurrent infection means that recurrent  
46 disease is the cause of nearly three-quarters of congenital CMV cases (3). Despite the  
47 incredible burden of congenital disease, existing methods to screen for fetal CMV infection are  
48 limiting in multiple important respects, including a lack of sensitivity and delayed identification of  
49 affected patients.

50 Due to the significant risks posed by primary congenital CMV, prenatal CMV screening  
51 via maternal serology has been proposed as an attractive approach to limit the incidence of  
52 disease in this population (5). Yet, a variety of issues can arise during interpretation of serology  
53 results, making diagnosis challenging (6–9). Additionally, the utility of serologic screening is  
54 limited to mothers with primary infections, thus excluding the substantial majority of congenital  
55 CMV cases that are associated with maternal reactivation or reinfection. Consequently, the  
56 current gold standard for diagnosing congenital CMV infection prenatally is amniocentesis, an  
57 invasive procedure best performed after 21 weeks gestation. Because of the risks associated  
58 with this procedure, amniocentesis is considered following radiologic and/or serologic evidence  
59 for congenital disease (10–12).

60 If not diagnosed antenatally, additional cases of congenital CMV are identified by testing  
61 for viral DNA in newborn saliva or urine within the first three weeks following a failed hearing  
62 screen or other concerning clinical characteristics (13). Although this is an important strategy to  
63 enable early intervention, the underlying developmental abnormalities are already established at

64 the time of testing and only demonstrate a modest response to antiviral treatment (14). Further  
65 limiting the impact of this approach is the observation that over half of congenital CMV cases  
66 manifest symptoms months to years after birth (15). In cases where delayed symptom onset is  
67 suspected, the diagnosis of congenital CMV infection is limited to retrospective testing of stored  
68 heel stick blood spots since PCR testing for CMV viremia after three weeks of life cannot  
69 exclude disease secondary to postnatal infection (16). In summary, the current landscape of  
70 congenital CMV screening is hindered by insensitive tools and delayed identification of cases.

71 Non-invasive prenatal testing (NIPT) via maternal cell-free DNA (cfDNA) has already  
72 revolutionized the ability to screen for fetal aneuploidies, subchromosomal copy number  
73 alterations, and other genetic diseases (17, 18). CMV have previously been detected in cfDNA  
74 sequencing data, including NIPT (19). At our institution, we have performed clinical screening  
75 for fetal aneuploidies by cfDNA since May 2017. As currently available non-invasive screening  
76 methods for congenital CMV infection are fraught with error and uncertainty, leveraging prenatal  
77 cfDNA sequencing would provide a new non-invasive approach for examining CMV disease  
78 burden and predicting clinical outcomes.

79

## 80 **Methods**

### 81 *Study population*

82 We included all maternal plasma samples collected between May 2017 to November 2018 for  
83 clinically-indicated aneuploidy screening performed at the University of Washington Department  
84 of Laboratory Medicine. The 2,208 cfDNA samples in our cohort were derived from pregnant  
85 women in the University of Washington (UW) Medicine network. Of these, 727 tests were  
86 performed during validation and 1,481 tests were performed during the clinical implementation  
87 phase. Metadata was available for the 1,325 patients (1,481 tests) screened during the clinical  
88 implementation phase (Supplementary Table 1). A minimum gestational age of 10 weeks was  
89 required for testing. Following University of Washington Institutional Review Board review and

90 approval, maternal and neonatal clinical histories were gathered for those samples with a CMV  
91 cfDNA reads per million sample reads (RPM) > 0.3 (10 samples, 9 patients) or those with a  
92 CMV cfDNA RPM < 0.3 and a positive qPCR result (2 samples, 2 patients). We collected  
93 maternal age, gravidity, parity, preexisting comorbidities, and results from ultrasound studies.  
94 Neonatal information included gestational age at birth, birth weight, APGAR scores, and mode  
95 of delivery. Additional information gathered from the antenatal period included admission to the  
96 neonatal intensive care unit (NICU), length of stay, and any infectious disease testing  
97 performed. Given the available cfDNA data, we also included maternal and placental cfDNA  
98 fractions and the number of total reads.

99

#### 100 *Non-invasive cell-free DNA sequencing*

101 cfDNA reads from maternal plasma were generated through a validated, laboratory-developed  
102 method used to screen for fetal aneuploidies and copy number alterations. For sample  
103 preparation, whole blood from Streck (BCT1) tubes was centrifuged and plasma was isolated as  
104 per the package insert. cfDNA was extracted from plasma using the QIAasymphony Circulating  
105 DNA Kit. Following measurement of the DNA concentration in the eluate, next-generation  
106 sequencing library preparation was performed on the BioMek 4000 using the KAPA HyperPrep  
107 kit for adapter and index ligation. The library was purified using the Agencourt AMPureXP kit  
108 prior to amplification. Following amplification, the library was purified on the Agilent BRAVO  
109 workstation using AMPure beads. Sample pools were created using an equimolar strategy and  
110 diluted to 1nM. Sequencing was performed using an Illumina NextSeq 500 using the High  
111 Output 75 cycle kit, with a 37bp paired-end read configuration.

112

#### 113 *Cell-free DNA bioinformatics pipeline for detection of CMV*

114 Paired-end 37bp cfDNA reads were aligned against the human herpesvirus 5 Merlin  
115 strain reference genome (NC\_006273.2) using bowtie2 (flag: --local --no-unal). The resulting

116 alignment file was filtered to exclude any aligned reads with fewer than 34 exact matches to the  
117 reference. Reads aligning to CMV by bowtie2 were then also confirmed via BLASTn alignment  
118 to the reference genome with a minimum evalue of 1e-5. CMV levels by cfDNA sequencing  
119 were quantified as CMV-specific RPM. A threshold of greater than or equal to 0.3 RPM was set  
120 as strong positive while any value greater than zero and less than 0.3 RPM was set as  
121 intermediate positive. Fragment length was calculated from the insert size column of the paired-  
122 end bam file for sample 121R04 after removal of duplicates using Picard's MarkDuplicates  
123 command (<http://broadinstitute.github.io/picard>). Statistics and graphical plotting were  
124 performed in R using ggplot2, ecdf, t.test, and Kolmogorov–Smirnov statistical tests (20). For  
125 median cfDNA insert size comparison and cumulative frequency distribution graphing, human  
126 reads were randomly downsampled to the same number as the CMV reads and statistical tests  
127 performed over 10,000 iterations.

128

129 *Cell-free DNA bioinformatics pipeline for detection of inherited chromosomally integrated HHV-6*  
130 *(iciHHV-6)*

131 All cfDNA sequences were aligned against telomere-trimmed versions of the HHV-6A  
132 (NC\_001664.4) and HHV-6B (AF157706.1) reference genomes using the same bowtie2 options  
133 as above. Any samples detected with non-repeat reads aligning in the HHV-6A or HHV-6B U38-  
134 U100 region were selected for further analyses.

135 These positive cfDNA files were then also aligned to portions of the human genes EDAR  
136 (NM\_022336.4) and beta-globin (AH001475.2) that were trimmed of human repeats  
137 (Supplemental Figure 1) using the same bowtie2 options specified above. Normalized depth of  
138 coverage was calculated by dividing all values by the highest RPKM determined and multiplying  
139 by 100 (*Normalized depth of coverage* =  $100 \times$

140  $\frac{RPKM \text{ value}}{\text{highest RPKM value determined}}$ ). RPKM values were calculated for each sample as  $RPKM =$

141 
$$\frac{\frac{\text{Reads aligning to region of interest}}{\text{Total Mapped Reads}}}{\frac{1,000,000}{1,000}}.$$

142

### 143 *PCR detection of CMV from cell-free DNA*

144 The 10 strong positive samples, a random selection of 32 intermediate positives, and 25  
145 run-matched negative controls were analyzed by qPCR to confirm CMV detection. Copy  
146 number for positive samples are presented in Supplementary Table 2. Remnant cfDNA from  
147 the original maternal plasma extraction was diluted to obtain 50 $\mu$ L of DNA. 15 $\mu$ l of sample was  
148 loaded into a 96 well plate with 17.5  $\mu$ l of Bio-Rad Ssoadvanced Universal Probes Supermix.  
149 Plates were sealed, mixed, and vortexed prior to amplification on an Applied Biosystems  
150 QuantStudio 7 Flex for 46 cycles at 50C for 2 minutes, 95C for 23 seconds, and 60C for 30  
151 seconds. Samples were run using primers and probes specific for the gB and IE EX-4 regions of  
152 CMV and human  $\beta$  –Globin (Supplementary Table 3). Copy number per milliliter was calculated  
153 using a standard curve. Cycle thresholds were compared to the RPM values generated from the  
154 bioinformatics pipeline using linear regression.

155

## 156 **Results**

### 157 *Characteristics of study population and testing performance*

158 The median gestational age for the 1,322 patients (1,481 samples) tested during the  
159 clinical implementation phase was 13 weeks and 6 days. Average maternal age was 34 years 6  
160 months. The most common indication for testing was advanced maternal age, accounting for  
161 58.3% of cases. Over the study period examined, a total of 35 aneuploidies were detected. For  
162 specimens with CMV detected by cfDNA and qPCR, maternal and neonatal outcomes were  
163 obtained via medical record review when available. Demographic features of patients tested are

164 listed in Supplemental Table 1 and a comparison between the CMV cfDNA positive and  
165 negative populations are presented in Supplemental Figure 1.

166 For the 2,208 samples in this study, the median number of total reads per sample was  
167 26,563,081 (central 95<sup>th</sup> percentile of 6,770,026 to 70,439,008). Variation in read depth was  
168 related to the number of samples batched per run, ranging from five to twenty-seven. A fetal  
169 fraction greater than 4% is required for clinical reporting of fetal aneuploidies; however, for this  
170 study, all results were analyzed regardless of fetal fraction.

171

#### 172 *Cytomegalovirus detection in cfDNA*

173 A total of 117/2208 samples (5.3%) contained at least one read mapping to CMV. 107  
174 were subsequently defined as intermediately positive ( $0 < \text{RPM} < 0.3$ ) and 10 were defined as  
175 strongly positive ( $\text{RPM} > 0.3$ ). The RPM values of the CMV-positive cfDNA samples are shown in  
176 Figure 1. Verification by qPCR testing was performed on all 10 strongly positive samples, a  
177 subset of intermediately positive ( $n=32$ ), and run-matched negative controls ( $n=25$ ). qPCR  
178 detected copies of CMV in 9/10 high positive samples and 2/32 intermediate positives. The  
179 control samples were appropriately negative for CMV and positive for beta-globin. We next  
180 compared the calculated CMV cfDNA RPM to viral load by qPCR. Linear regression analysis  
181 demonstrated a weak positive correlation between cfDNA CMV reads and viral load by qPCR  
182 ( $R^2 = 0.42$ ) over the concentrations examined (Figure 2).

183

#### 184 *Short fragment length of CMV cfDNA*

185 In order to attain sufficient reads to estimate the fragment length of CMV cfDNA, we took  
186 the cfDNA sample (121R04) with the highest percent CMV measured by sequencing and  
187 sequenced it to a total depth of 498 million paired-end reads. Of these, 4,098 paired reads  
188 mapped to CMV by bowtie and BLASTn analysis, of which 2,055 fragments remained after  
189 deduplication. Reads obtained from our pipeline generally aligned across the length of the CMV



190 genome but had a noticeable lack of coverage in the RL12-RL13-UL1 region (10-13kb locus in  
191 the NC\_006273.2 reference genome) (Supplemental Figure 2).

192 We found that the median CMV fragment length in cfDNA was significantly shorter than  
193 that of human-derived cfDNA (103 v. 172 bp,  $p=4.1e-102$ ), placing it at the 3<sup>rd</sup> percentile of  
194 human cfDNA fragment size (Figure 3A). The distribution of CMV cfDNA fragment size [IQR  
195 63-170 bp] was also significantly different than that of human-derived cfDNA [IQR 158-190 bp]  
196 (Kolmogorov–Smirnov test,  $p<2.2e-16$ ) (Figure 3B).

197

#### 198 *HHV-6 detection in cfDNA*

199 In order to compare to another betaherpesvirus, we also looked at cfDNA detection of  
200 HHV-6. 18 cfDNA samples from 17 different patients had reads aligning to the U38-U100  
201 region of HHV-6A or HHV-6B and were classified as HHV-6 positive. Of these 18 positive  
202 samples, 12 had a significantly higher ratio of genomic copies of HHV-6:human genome copies  
203 (EDAR or beta-globin), likely consistent with inherited chromosomally-integrated HHV-6 (Figure  
204 4A) (21). The median fragment length of HHV-6 cfDNA by NIPT sequencing across all positive  
205 samples was 167 bp [IQR 149-181 bp], approximating that of human-derived cfDNA. When we  
206 specifically compared at the fragment length of the twelve high and six low HHV-6 samples  
207 compared to human cfDNA, the six low level HHV-6 samples had a shorter fragment length  
208 (median 146 bp [IQR 104-176 bp]) than the twelve high level HHV-6 samples (Figure 4B/C).  
209 These results are most consistent with a model of normal chromatinization of maternal iciHHV-6  
210 DNA in the high level HHV-6 samples, with the shorter fragments of low level HHV-6 deriving  
211 from the placenta due to paternal transmission of iciHHV-6 to the fetus.

212

#### 213 *Clinical outcomes of mother and fetus following CMV cell-free DNA detection*

214 Clinical records for five mothers and five offspring were available from the ten strong  
215 positive CMV cfDNA samples (9 patients) and two qPCR-positive, CMV cfDNA intermediate

216 positive samples (2 patients). Clinical records were not available for the remaining cases.  
217 Maternal age ranged from 29 to 39 years with a parity range of 1 to 3. Fetal outcomes included  
218 elective termination for trisomy 21, preterm delivery at 20 weeks gestation, and three live births.  
219 Two of the live births were uncomplicated full-term vaginal deliveries, while the other delivered  
220 via Cesarean section at 32 weeks gestation due to decreased fetal movement and non-  
221 reassuring fetal status. This preterm infant had low APGAR scores and was admitted to the  
222 neonatal intensive care unit for prematurity and respiratory distress. The infant was discharged  
223 home after 40 days of hospitalization without further apparent complications. In none of the  
224 above cases was CMV PCR performed on the mother or neonate.

## 225 Discussion

226           Given the global impact and life-long complications of congenital CMV infection, an  
227 effective screening strategy to facilitate early intervention is necessary. In exploring the  
228 technical feasibility of CMV cfDNA detection, we have discovered that CMV cfDNA exists in  
229 circulation at a smaller fragment size than human chromosomally-derived cfDNA. CMV  
230 detection from prenatal cfDNA samples sent for aneuploidy testing offers an added benefit over  
231 plasma qPCR in that no additional wet lab testing is required.

232           By establishing the fragment size of CMV cfDNA through ultra-deep sequencing, we  
233 have identified a potential mechanism contributing to the variation in CMV levels obtained from  
234 different qPCR assays. Despite a recently implemented international standard, variation in  
235 plasma CMV DNA levels measured by qPCR across different clinical laboratories has remained  
236 high, with variation of up to 2 log<sub>10</sub> in copy number between assays (24). Amplicon size has  
237 been identified as a major contributor to interassay variability, with larger amplicons having a  
238 relatively lower IU/ml as compared to smaller amplicons (25). Given that amplicons in CMV  
239 qPCR assays range in size from 52 to 340bp, it is reasonable to assume that PCR assays  
240 developed for smaller amplicons would more readily amplify CMV cfDNA fragments. Previous  
241 studies indicated that CMV DNA in plasma exists as highly fragmented, virion-free DNA,  
242 suggesting that the cfDNA fragments measured here may constitute the vast majority of the  
243 CMV DNA present in plasma (26, 27). Characterizing CMV cfDNA insert size may also assist in  
244 designing target enrichment strategies and improving bioinformatic pipelines for infectious  
245 disease screening. The CMV reads obtained from the cfDNA data were generally distributed  
246 across the genome without preferential representation of any one region, although curiously low  
247 coverage was seen across the RL12-RL13-UL1 gene region, which was also seen in a prior  
248 cfDNA study (28). Future studies will be needed to examine more samples to test the  
249 generalizability of our single specimen estimation and to explore the effect of cfDNA *in vivo* as it  
250 relates to CMV DNA quantitation.

251 To demonstrate that our approach has the robustness to identify other viral pathogens,  
252 we interrogated the cfDNA sequencing data for evidence of iciHHV6. When our cohort of  
253 maternal cfDNA samples were analyzed, we identified 18 HHV6-positive samples, 12 of which  
254 appeared consistent with maternal iciHHV6 based on fragment length and copy number (Figure  
255 4). Differences in the size distribution of placental and maternal cfDNA may allow for the  
256 identification of fetal iciHHV6 in iciHHV6-negative mothers. In the six HHV6-positive samples  
257 with an RKPM value below what is expected in iciHHV6, the cfDNA size distribution of the  
258 HHV6 reads closely matched that seen in placental cfDNA. We hypothesize the shorter read  
259 distribution arising in this population is the result of iciHHV6 from placental DNA fragments.

260 In our qPCR studies measuring CMV DNAemia, one cfDNA strong positive sample was  
261 negative despite a detectable housekeeping control gene. In this sample, the beta-globin signal  
262 was 1.0  $\log_{10}$  lower than the next lowest positive sample. This finding strongly argues that the  
263 negative CMV qPCR result was a function of low input DNA as opposed to a true negative.  
264 Consistent with this hypothesis, within the intermediate positive samples only 2 of the 32 tested  
265 were positive. The relative insensitivity of qPCR may be related to an insufficient number of  
266 DNA fragments in the sample spanning the full length of the amplicon. Alternatively, these false  
267 negative qPCR results may be due to the volume of DNA available after cfDNA sequencing. Of  
268 note, in our standard qPCR assay we elute 100 $\mu$ l of DNA extracted from 200 $\mu$ L of plasma and  
269 perform qPCR on 15 $\mu$ L of the DNA eluate. In the qPCR experiments for this study, our DNA  
270 was derived from the eluate of the cell-free extraction method wherein 4mL of whole blood is  
271 drawn, extracted, and eluted into 60 $\mu$ l, of which 30 $\mu$ L is used for library preparation. The  
272 remaining sample volume available for qPCR from these extractions ranged from 1 to 20 $\mu$ l. We  
273 standardized the volume using ultra-pure water and adjusted the calculated DNAemia according  
274 to the input volume.

275 Our study is chiefly limited by the comparatively small number of patients used for CMV  
276 cfDNA fragment length estimation and clinical chart review, despite the screening of more than

277 2,200 specimens. We chose to more deeply sequence one specimen with the highest amount  
278 of CMV as recovered by cfDNA sequencing. This may bias our estimation of CMV cfDNA  
279 fragment length in the general population, since this specimen had comparatively more reads to  
280 CMV as would be predicted by qPCR. Certainly, more cfDNA sequencing in other clinical  
281 contexts where CMV detection is critical such as stem-cell or solid organ transplant is required.  
282 Because clinical outcomes were only available in five patients, drawing any conclusions in  
283 regard to clinical outcomes of a positive CMV cfDNA result is difficult. Maternal data is lacking  
284 for six of the strongly CMV cfDNA positive samples due to the mother receiving her subsequent  
285 obstetric care at an outside institution. Furthermore, our hospital system is separate from the  
286 major pediatric hospital in our area. As a result, we were unable to obtain any significant clinical  
287 history or post-natal outcomes for a portion of the strongly positive cases we identified. While at  
288 least one case resulted in prolonged hospitalization due largely to prematurity, no CMV testing  
289 was performed and imaging studies did not suggest congenital CMV infection. Despite the  
290 potential of cfDNA as a diagnostic tool in early detection of congenital CMV, future studies must  
291 address whether a level of CMV cfDNA predictive of congenital infection exists.

292 **References**

- 293 1. Kenneson A, Cannon MJ. 2007. Review and meta-analysis of the epidemiology of  
294 congenital cytomegalovirus (CMV) infection. *Rev Med Virol* 17:253–276.
- 295 2. Dollard SC, Grosse SD, Ross DS. 2007. New estimates of the prevalence of neurological  
296 and sensory sequelae and mortality associated with congenital cytomegalovirus infection.  
297 *Rev Med Virol* 17:355–363.
- 298 3. Society for Maternal-Fetal Medicine (SMFM), Hughes BL, Gyamfi-Bannerman C. 2016.  
299 Diagnosis and antenatal management of congenital cytomegalovirus infection. *Am J Obstet*  
300 *Gynecol* 214:B5–B11.
- 301 4. Ross SA, Boppana SB. 2005. Congenital cytomegalovirus infection: outcome and diagnosis.  
302 *Semin Pediatr Infect Dis* 16:44–49.
- 303 5. Adler SP. 2011. Screening for Cytomegalovirus during Pregnancy. *Infect Dis Obstet*  
304 *Gynecol* 2011.
- 305 6. Nigro G, Adler SP, La Torre R, Best AM, Congenital Cytomegalovirus Collaborating Group.  
306 2005. Passive immunization during pregnancy for congenital cytomegalovirus infection. *N*  
307 *Engl J Med* 353:1350–1362.
- 308 7. Lazzarotto T, Guerra B, Lanari M, Gabrielli L, Landini MP. 2008. New advances in the  
309 diagnosis of congenital cytomegalovirus infection. *J Clin Virol* 41:192–197.
- 310 8. Adler SP. 2012. Editorial commentary: Primary maternal cytomegalovirus infection during  
311 pregnancy: do we have a treatment option? *Clin Infect Dis* 55:504–506.

- 312 9. Lazzarotto T, Guerra B, Gabrielli L, Lanari M, Landini MP. 2011. Update on the prevention,  
313 diagnosis and management of cytomegalovirus infection during pregnancy. *Clin Microbiol*  
314 *Infect* 17:1285–1293.
- 315 10. Enders G, Bäder U, Lindemann L, Schalasta G, Daiminger A. 2001. Prenatal diagnosis of  
316 congenital cytomegalovirus infection in 189 pregnancies with known outcome. *Prenat Diagn*  
317 21:362–377.
- 318 11. Donner C, Liesnard C, Brancart F, Rodesch F. 1994. Accuracy of amniotic fluid testing  
319 before 21 weeks' gestation in prenatal diagnosis of congenital cytomegalovirus infection.  
320 *Prenat Diagn* 14:1055–1059.
- 321 12. Liesnard C, Donner C, Brancart F, Gosselin F, Delforge ML, Rodesch F. 2000. Prenatal  
322 diagnosis of congenital cytomegalovirus infection: prospective study of 237 pregnancies at  
323 risk. *Obstet Gynecol* 95:881–888.
- 324 13. Boppana SB, Ross SA, Novak Z, Shimamura M, Tolan RW, Palmer AL, Ahmed A, Michaels  
325 MG, Sánchez PJ, Bernstein DI, Britt WJ, Fowler KB, Study for the NI on D and OCDC and  
326 HMS (CHIMES). 2010. Dried Blood Spot Real-time Polymerase Chain Reaction Assays to  
327 Screen Newborns for Congenital Cytomegalovirus Infection. *JAMA* 303:1375–1382.
- 328 14. Kimberlin DW, Lin C-Y, Sánchez PJ, Demmler GJ, Dankner W, Shelton M, Jacobs RF,  
329 Vaudry W, Pass RF, Kiell JM, Soong S, Whitley RJ, National Institute of Allergy and  
330 Infectious Diseases Collaborative Antiviral Study Group. 2003. Effect of ganciclovir therapy  
331 on hearing in symptomatic congenital cytomegalovirus disease involving the central nervous  
332 system: a randomized, controlled trial. *J Pediatr* 143:16–25.

- 333 15. Fowler KB, McCollister FP, Dahle AJ, Boppana S, Britt WJ, Pass RF. 1997. Progressive and  
334 fluctuating sensorineural hearing loss in children with asymptomatic congenital  
335 cytomegalovirus infection. *J Pediatr* 130:624–630.
- 336 16. Misono S, Sie KCY, Weiss NS, Huang M, Boeckh M, Norton SJ, Yueh B. 2011. Congenital  
337 Cytomegalovirus Infection in Pediatric Hearing Loss. *Arch Otolaryngol Head Neck Surg*  
338 137:47–53.
- 339 17. Lo YM, Corbetta N, Chamberlain PF, Rai V, Sargent IL, Redman CW, Wainscoat JS. 1997.  
340 Presence of fetal DNA in maternal plasma and serum. *Lancet* 350:485–487.
- 341 18. Lo YM, Tein MS, Lau TK, Haines CJ, Leung TN, Poon PM, Wainscoat JS, Johnson PJ,  
342 Chang AM, Hjelm NM. 1998. Quantitative analysis of fetal DNA in maternal plasma and  
343 serum: implications for noninvasive prenatal diagnosis. *Am J Hum Genet* 62:768–775.
- 344 19. Chesnais V, Ott A, Chaplais E, Gabillard S, Pallares D, Vauloup-Fellous C, Benachi A,  
345 Costa J-M, Ginoux E. 2018. Using massively parallel shotgun sequencing of maternal  
346 plasmatic cell-free DNA for cytomegalovirus DNA detection during pregnancy: a proof of  
347 concept study. *Sci Rep* 8:4321.
- 348 20. Wickham H. 2009. *Ggplot2: Elegant Graphics for Data Analysis*, 2nd ed. Springer  
349 Publishing Company, Incorporated.
- 350 21. Sedlak RH, Hill JA, Nguyen T, Cho M, Levin G, Cook L, Huang M-L, Flamand L, Zerr DM,  
351 Boeckh M, Jerome KR. 2016. Detection of Human Herpesvirus 6B (HHV-6B) Reactivation in  
352 Hematopoietic Cell Transplant Recipients with Inherited Chromosomally Integrated HHV-6A  
353 by Droplet Digital PCR. *J Clin Microbiol* 54:1223–1227.



- 354 22. Society for Maternal-Fetal Medicine (SMFM), Hughes BL, Gyamfi-Bannerman C. 2016.  
355 Diagnosis and antenatal management of congenital cytomegalovirus infection. *Am J Obstet*  
356 *Gynecol* 214:B5–B11.
- 357 23. American College of Obstetricians and Gynecologists. 2015. Practice bulletin no. 151:  
358 Cytomegalovirus, parvovirus B19, varicella zoster, and toxoplasmosis in pregnancy. *Obstet*  
359 *Gynecol* 125:1510–1525.
- 360 24. Hayden RT, Preiksaitis J, Tong Y, Pang X, Sun Y, Tang L, Cook L, Pounds S, Fryer J,  
361 Caliendo AM. 2015. Commutability of the First World Health Organization International  
362 Standard for Human Cytomegalovirus. *J Clin Microbiol* 53:3325–3333.
- 363 25. Preiksaitis JK, Hayden RT, Tong Y, Pang XL, Fryer JF, Heath AB, Cook L, Petrich AK, Yu  
364 B, Caliendo AM. 2016. Are We There Yet? Impact of the First International Standard for  
365 Cytomegalovirus DNA on the Harmonization of Results Reported on Plasma Samples. *Clin*  
366 *Infect Dis* 63:583–589.
- 367 26. Boom R, Sol CJA, Schuurman T, van Breda A, Weel JFL, Beld M, ten Berge IJM, Wertheim-  
368 van Dillen PME, de Jong MD. 2002. Human Cytomegalovirus DNA in Plasma and Serum  
369 Specimens of Renal Transplant Recipients Is Highly Fragmented. *J Clin Microbiol* 40:4105–  
370 4113.
- 371 27. Tong Y, Pang XL, Mabilangan C, Preiksaitis JK. 2017. Determination of the Biological Form  
372 of Human Cytomegalovirus DNA in the Plasma of Solid-Organ Transplant Recipients. *J*  
373 *Infect Dis* 215:1094–1101.
- 374 28. Liu S, Huang S, Chen F, Zhao L, Yuan Y, Francis SS, Fang L, Li Z, Lin L, Liu R, Zhang Y,  
375 Xu H, Li S, Zhou Y, Davies RW, Liu Q, Walters RG, Lin K, Ju J, Korneliussen T, Yang MA,  
376 Fu Q, Wang J, Zhou L, Krogh A, Zhang H, Wang W, Chen Z, Cai Z, Yin Y, Yang H, Mao M,

377 Shendure J, Wang J, Albrechtsen A, Jin X, Nielsen R, Xu X. 2018. Genomic Analyses from  
378 Non-invasive Prenatal Testing Reveal Genetic Associations, Patterns of Viral Infections, and  
379 Chinese Population History. *Cell* 175:347-359.e14.

380

381

382 **Figure Legends**

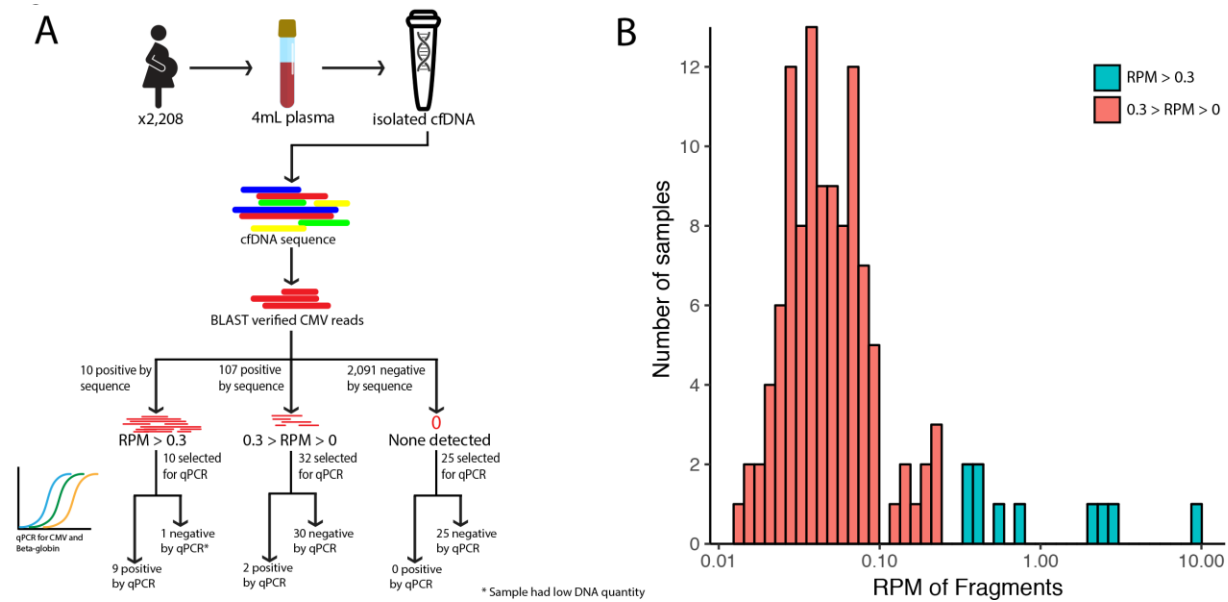

383

384 **Figure 1** – cfDNA pipeline and results. A) Specimen handling for detecting CMV cfDNA.

385 Following library sequencing, data was aligned to the human herpesvirus 5 Merlin strain

386 reference genome (NC\_006273.2). A subset of samples was tested via qPCR. B) CMV read

387 distribution by sample. An arbitrary threshold of 0.3 CMV reads per one million reads (RPM)

388 was set to classify specimens as strong (blue) or intermediate positive (red).

389

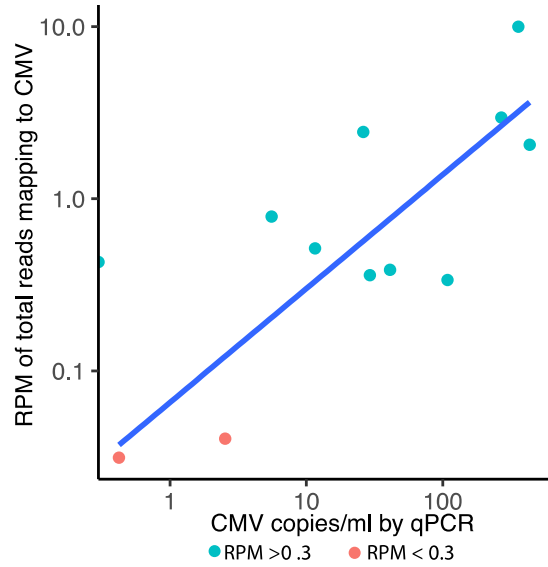

390

391 **Figure 2** – CMV cfDNA reads per million (RPM) correlate with DNAemia calculated by qPCR.

392 For samples identified with positive CMV cfDNA reads and positive qPCR, comparing the

393 values via scatter plot demonstrates a positive correlation between results ( $R^2=0.46$ ).

394

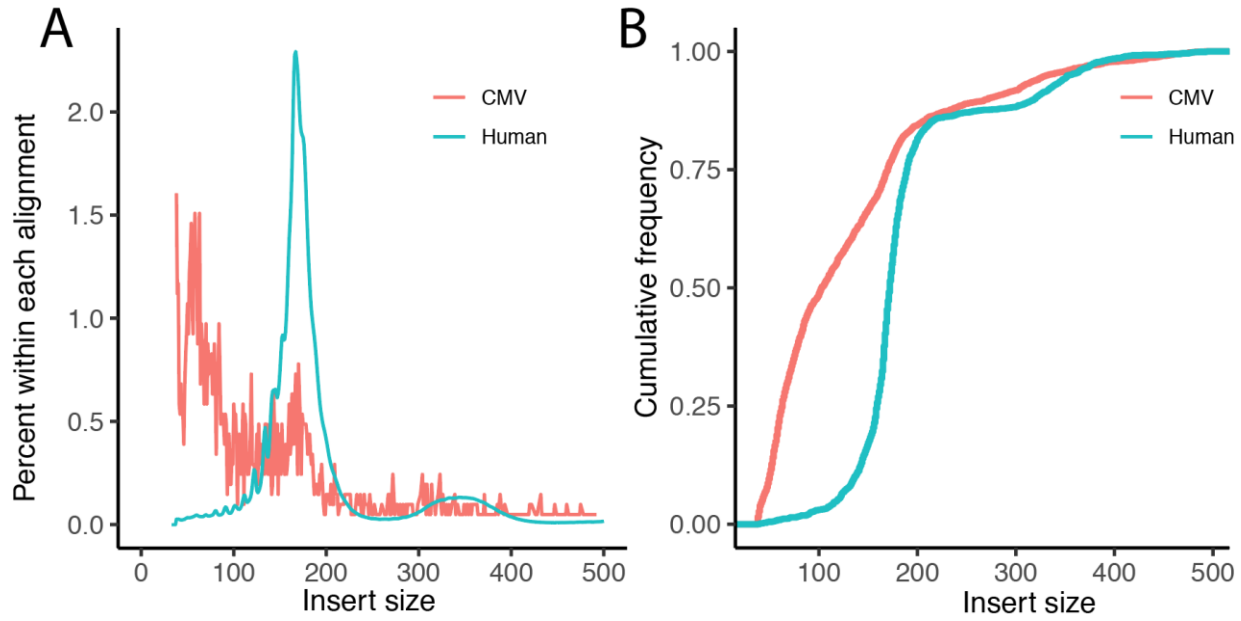

395

396

397 **Figure 3** – CMV cfDNA insert size from 121R04 is significantly shorter than that of human

398 cfDNA. The median fragment length for CMV cfDNA was 103 [IQR 63-170 bp], while that of

399 human cfDNA was 172 bp [IQR 158-190 bp].

400

401

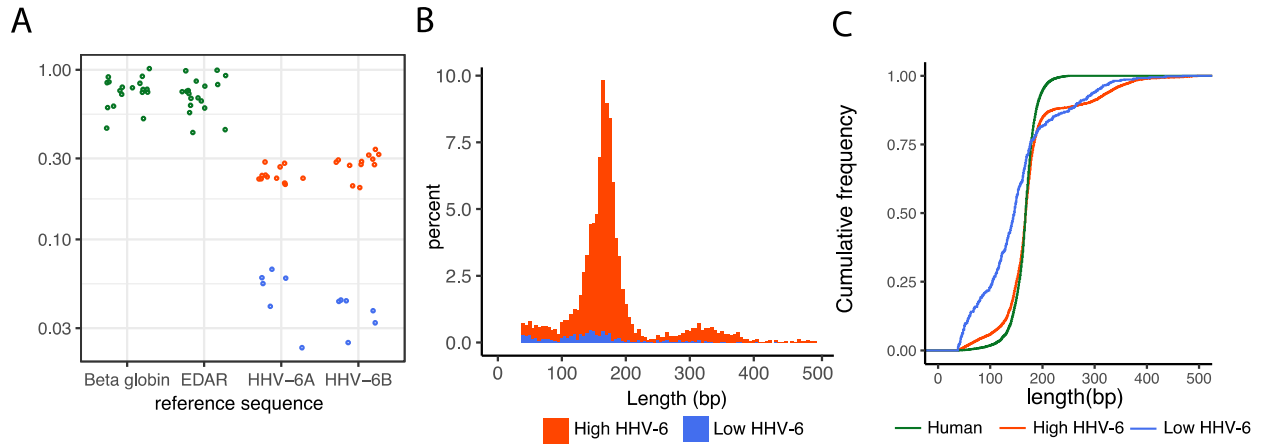

402

403

404 **Figure 4** – Eighteen samples had HHV-6 cfDNA present, of which twelve had higher levels  
405 consistent with iciHHV-6 and six had lower levels relative to human housekeeping genes, beta-  
406 globin and EDAR (A). The fragment length distribution of the HHV-6 cfDNA from the high cluster  
407 mirrors that of human cfDNA (B). The median fragment length of cfDNA for the high HHV-6  
408 cluster cfDNA was 167 bp [IQR 149-181 bp], while that of low HHV-6 cluster was 146 bp [IQR  
409 104-176 bp] (B and C).

410

411

412 **Supplemental Tables**

413 **Supplemental Table 1** – Patient demographics for the clinical implementation phase of our

414 cfDNA prenatal screen. Data was collected at the same time as the specimen. A total of 1,481

415 samples were tested for 1,325 patients. These data do not include patient demographics for

416 samples tested during the validation phase.

417

|                                                       | Patients Tested<br>(n=1,325)<br>average |
|-------------------------------------------------------|-----------------------------------------|
| <b>Patient characteristics</b>                        |                                         |
| maternal age (years)                                  | 34.5                                    |
| gestational age (days)                                | 98                                      |
| Height (inches)                                       | 64.3                                    |
| Weight (pounds)                                       | 162                                     |
| BMI (kg/m <sup>2</sup> )                              | 28.1                                    |
| <b>Indications for testing</b>                        | <b>Number of cases</b>                  |
| advanced maternal age                                 | 773                                     |
| abnormal ultrasound                                   | 141                                     |
| abnormal serum screen                                 | 73                                      |
| history of increased risk                             | 33                                      |
| No indication listed                                  | 66                                      |
| Other                                                 | 239                                     |
| <b>Aneuploidies detected</b>                          | <b>35</b>                               |
| Common autosome aneuploidies<br>(trisomy 13, 18, 21)  | 10                                      |
| Rare autosome aneuploidies                            | 9                                       |
| Subchromosomal deletion                               | 5                                       |
| Sex chromosome aneuploidies<br>(monosomy X, XXY, XXX) | 11                                      |

418

419 **Supplemental Table 2** – Quantities for CMV copies per mL plasma for positive samples  
420 identified by cfDNA and analyzed by qPCR. Specimens marked with (\*) were identified as  
421 intermediate positive samples based on copy number in cfDNA sequencing, while specimen  
422 34P02 (#) had fewer than 5 $\mu$ L of DNA remaining.

| <b>Sample Name</b> | <b>CMV<br/>copies / ml</b> | <b>Beta-globin<br/>copies / mL</b> |
|--------------------|----------------------------|------------------------------------|
| <b>10P13</b>       | 269.3                      | 2096.6                             |
| <b>111P08</b>      | 11.6                       | 1024.3                             |
| <b>121R04</b>      | 358.6                      | 1324.3                             |
| <b>34P02#</b>      | 0.0                        | 699.6                              |
| <b>3P13</b>        | 433.8                      | 4084.9                             |
| <b>80P04</b>       | 108.4                      | 8564.4                             |
| <b>84P05</b>       | 41.0                       | 3840.8                             |
| <b>92P02</b>       | 26.2                       | 1422.4                             |
| <b>92R11</b>       | 5.6                        | 1878.9                             |
| <b>104R</b>        | 29.3                       | 495.9                              |
| <b>44P05*</b>      | 2.5                        | 1017.5                             |
| <b>96R12*</b>      | 0.4                        | 1822.9                             |

423



| Primer               | Sequence                                                   |
|----------------------|------------------------------------------------------------|
| CMVgB primer F       | TGG GCG AGG ACA ACG AA                                     |
| CMVgB primer R       | TGA GGC TGG GAA GCT GAC AT                                 |
| CMVgB probe          | FAM-TGG GCA ACC ACC GCA CTG AGG-TAMRA                      |
| CMV IE EX-4 primer F | TCC CGC TTA TCC TCR GGT ACA                                |
| CMV IE EX-4 primer R | TGA GCC TTT CGA GGA SAT GAA                                |
| CMV IE EX-4 probe    | FAM-TCT CAT ACA TGC TCT GCA TAG TTA GCC CAA<br>TAC A-TAMRA |

424

425 **Supplemental Table 3** – CMV qPCR primer and probe sequences.

426

427 **Supplemental Figures**

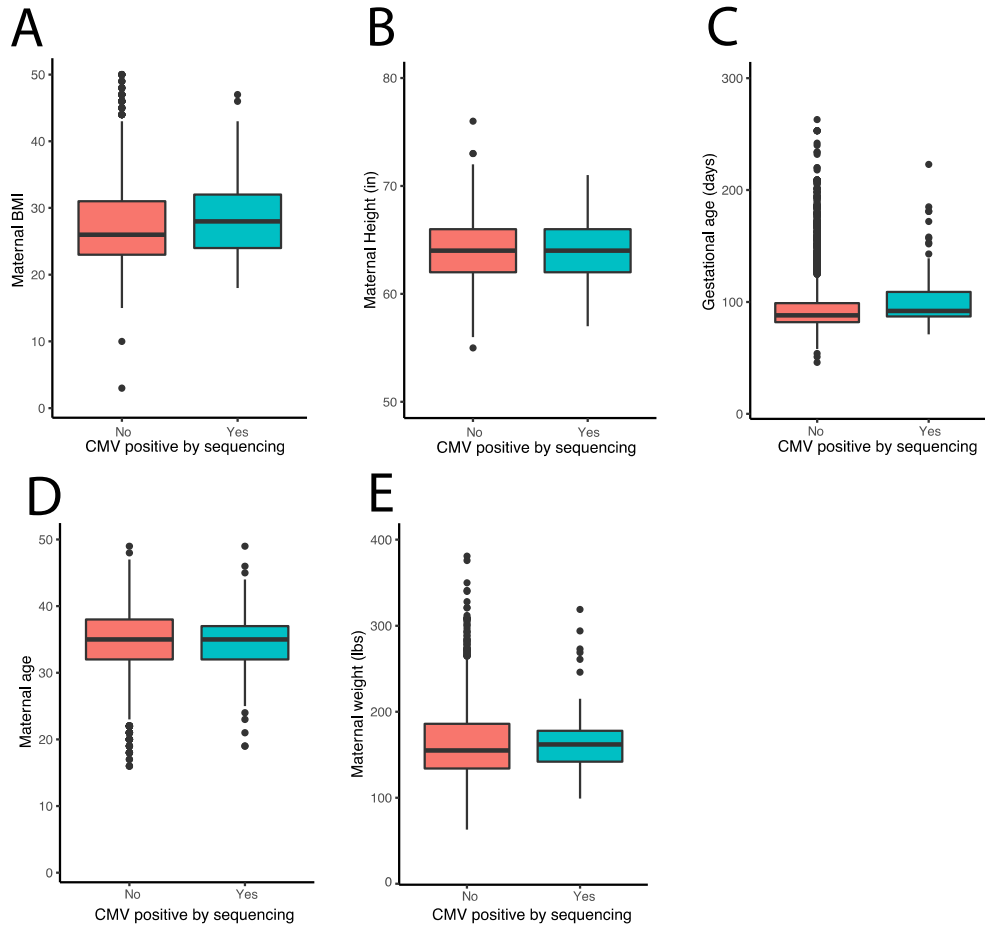

428 **Supplemental Figure 1** Comparison of maternal demographics based on CMV cfDNA  
429 positivity: A. Maternal BMI (kg/m<sup>2</sup>) B. Maternal Height (inches) C. Gestational age (days) D.  
430 Maternal age (years) E. Maternal Weight (pounds).  
431

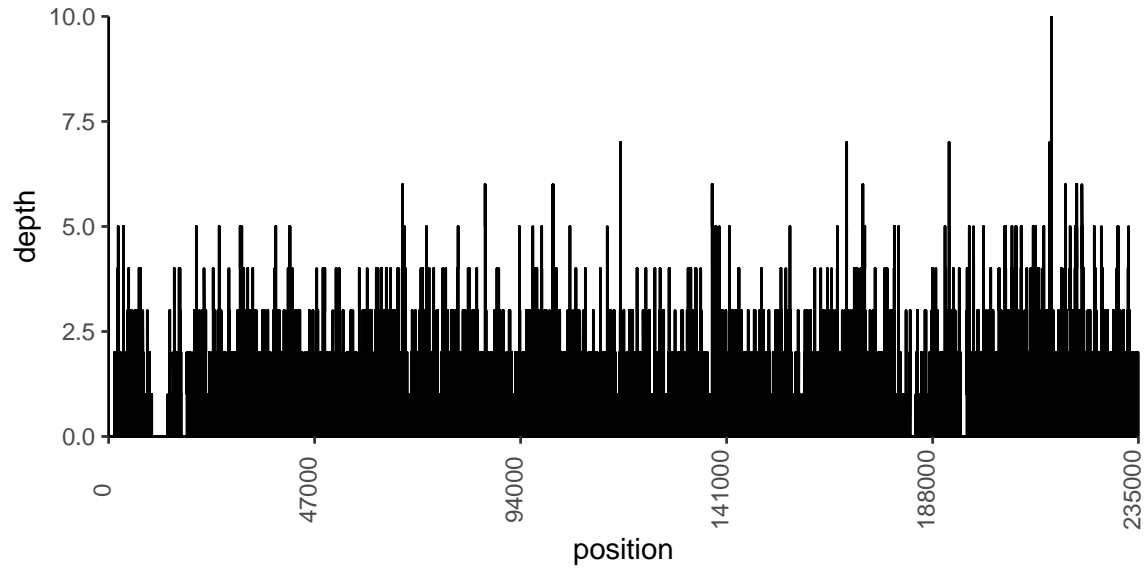

432

433 **Supplemental Figure 2** – Read coverage of the CMV genome from sample 121R04. Reads

434 were mapped to the human herpesvirus 5 Merlin strain reference genome.

435
